# Supplementary material
Source: PubMed Central journal article supplement (PMC4426808)
Supplement: mt2014200x2.pdf [file mt2014200x2.pdf]

**Table S1. Follistatin Gene Therapy Adverse Events**

|            |                                           |                                                                                         |                                                                                    |
|------------|-------------------------------------------|-----------------------------------------------------------------------------------------|------------------------------------------------------------------------------------|
| Patient 01 | Pain in Right foot from soft corn removal | Outpatient Surgery                                                                      | Reported as non-serious, mild and not related to gene transfer. Patient recovered. |
| Patient 01 | Depression                                |                                                                                         | Not related to gene transfer. Patient in treatment                                 |
| Patient 02 | Hypertension                              | Increase in blood pressure due to prednisone treatment<br>Treated with low Sodium diet. | Reported as non-serious, mild and not related to gene transfer. Patient recovered. |
| Patient 04 | Constipation                              |                                                                                         | Reported as non-serious, mild not related to the gene transfer. Patient recovered. |
| Patient 04 | Sore Throat                               |                                                                                         | Reported as non-serious, mild, and unrelated to gene transfer. Patient recovered   |
| Patient 04 | Tachycardia                               | ECHO was performed and a Cardiology evaluation done. Echo results reported as normal.   | Reported as non-serious, mild, and unrelated. Patient recovered.                   |
| Patient 04 | Shortness of breath                       | ECHO was performed and a Cardiology evaluation done, both results were normal           | Reported as non-serious mild, and unrelated to gene transfer. Patient recovered    |
| Patient 04 | Skin rash/Folliculitis                    | Patient follow up with Dermatologist and received treatment                             | Reported as non-serious mild, and unrelated to gene transfer. Patient recovered.   |

|            |                                                     |                                                                   |                                                                                   |
|------------|-----------------------------------------------------|-------------------------------------------------------------------|-----------------------------------------------------------------------------------|
| Patient 04 | Fatigue and weakness                                | Symptoms related to BMD                                           | Reported as non-serious, mild, and unrelated to gene transfer Patient recovered.  |
| Patient 04 | Joint pain (Elbows and Knees)                       | Symptoms related to BMD                                           | Reported as non-serious mild, and unrelated to gene transfer. Patient recovered.  |
| Patient 04 | Panic attacks                                       | Due to anxiety disorder, patient in treatment by his Psychiatrist | Reported as non-serious, mild, and unrelated to gene transfer. Patient recovered. |
| Patient 05 | Generalized headache                                | Occasional generalized headache self-treated with OTC medications | Reported as non-serious, mild, and unrelated to gene transfer .Patient recovered. |
| Patient 06 | Acne                                                | Facial acne increased when patient started on prednisone          | Reported as non-serious, mild, and unrelated to gene transfer. Patient recovered. |
| Patient 06 | Skin Infection at the muscle biopsy site (left leg) |                                                                   | Reported as non-serious, mild, and unrelated to gene transfer. Patient recovered. |
