# Supplementary material
Source: PubMed Central journal article supplement (PMC4426808)
Supplement: mt2014200x3.pdf [file mt2014200x3.pdf]

**Supplementary Table 2.** Follistatin DNA copy number

| <b>Subject</b> | <b>FS344 (vg/kg/DNA)</b> |
|----------------|--------------------------|
| 01             | 1.73E+03                 |
| 02             | 5.65E+04                 |
| 03             | 9.38E+03                 |
| 04             | nd <sup>a</sup>          |
| 05             | 3.43E+04                 |
| 06             | 2.45E+04                 |

**Abbreviations:** FS344: follistatin isoform 344; vg: vector genome; kg: kilogram; nd: not done

<sup>a</sup> this subject declined post-treatment biopsy
